# Supplementary material for: Human gut microbiota fermentation of cooked eggplant, garlic, and onion supports distinct microbial communities
Source: Royal Society of Chemistry journal article supplement (doi:10.1039/d3fo04526a), 2024-01-01
Supplement: d3fo04526a1.pdf [file d3fo04526a1.pdf]

**Supplementary Table 1. Salt composition of digestion fluids, mmol L<sup>-1</sup>**

| <i>Salt</i>                                       | <i>Salivary fluid (pH 7)</i> | <i>Gastric fluid (pH 3)</i> | <i>Intestinal fluid (pH 7)</i> |
|---------------------------------------------------|------------------------------|-----------------------------|--------------------------------|
| KCl                                               | 15.1                         | 6.9                         | 6.8                            |
| KH <sub>2</sub> PO <sub>4</sub>                   | 3.7                          | 0.9                         | 0.8                            |
| NaHCO <sub>3</sub>                                | 13.7                         | 25.0                        | 85.0                           |
| NaCl                                              | -                            | 47.2                        | 38.4                           |
| MgCl <sub>2</sub> (H <sub>2</sub> O) <sub>6</sub> | 0.15                         | 0.12                        | 0.33                           |
| NH <sub>4</sub> (CO <sub>3</sub> ) <sub>2</sub>   | 0.06                         | 0.5                         | -                              |
| CaCl <sub>2</sub> (H <sub>2</sub> O) <sub>2</sub> | 1.5                          | 0.15                        | 0.6                            |
| HCl                                               | 1.1                          | 15.6                        | 8.4                            |
